# Supplementary material for: Thermally healable polyurethane with tailored mechanical performance using dynamic crosslinking motifs
Source: Royal Society of Chemistry journal article supplement (doi:10.1039/d0nj02671a), 2020-01-01
Supplement: d0nj02671a1.pdf [file d0nj02671a1.pdf]

## Supporting Information

### Thermally Healable Polyurethane with Tailored Mechanical Performance Using Dynamic Crosslinking Motifs

Haopu Xie<sup>a,b</sup>, Dekun Sheng<sup>a</sup>, Yan Zhou<sup>a,b</sup>, Shaobin Xu<sup>a,b</sup>, Haohao Wu<sup>a,b</sup>, Xinxin Tian<sup>a,b</sup>, Yinglu Sun<sup>a,b</sup>,

Xiangdong Liu<sup>\*a</sup> and Yuming Yang<sup>\*a,b</sup>

<sup>a</sup> CAS Key Laboratory of High-Performance Synthetic Rubber and its Composite Materials, Changchun Institute of Applied Chemistry, Chinese Academy of Sciences, Changchun, 130022, P. R. China.

<sup>b</sup> University of Science and Technology of China, Hefei, 230026, P. R. China

\*Corresponding authors. E-mail: liuxiangdong@ciac.ac.cn(X. Liu), ymyang@ciac.ac.cn(Y. Yang).

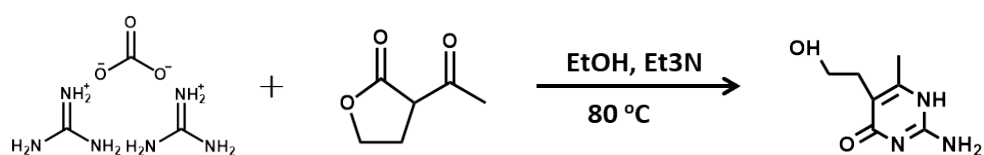

Scheme S1. Synthesis route of UPy

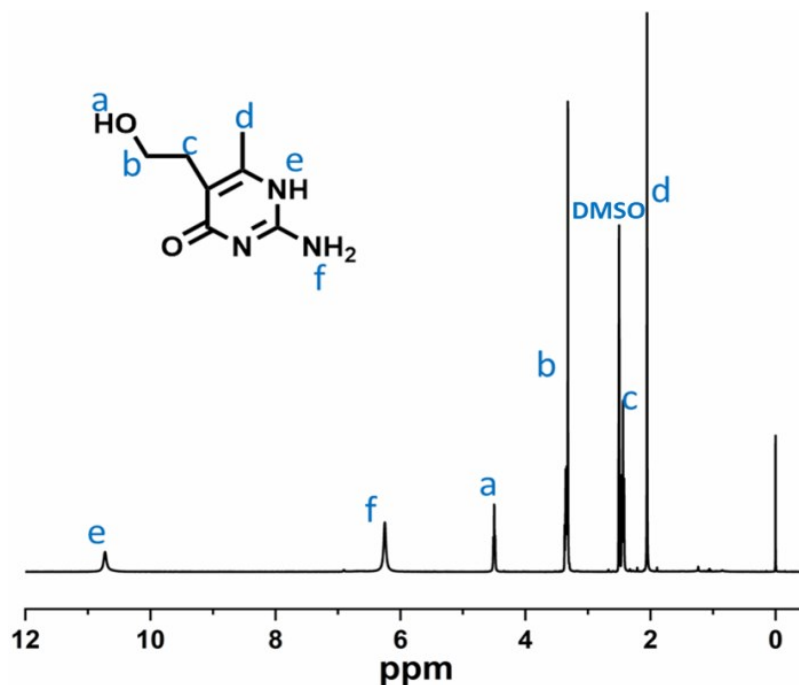

Figure S1, <sup>1</sup>H-NMR spectrum of UPy (DMSO-d<sub>6</sub>, 400MHz, 25°C): 10.72 (s,1H,NH), 6.25 (s,2H,NH<sub>2</sub>), 4.50 (t,1H,OH), 3.36 (t,2H,CH<sub>2</sub>), 2.44 (t,3H,CH<sub>2</sub>), 2.05 (s,3H,CH<sub>3</sub>).

Table S1. Molecular weight of SHP-X

| Samples | Mn (10 <sup>4</sup> g/mol) | Mw (10 <sup>4</sup> g/mol) | PD   |
|---------|----------------------------|----------------------------|------|
| SHP-0   | 11.62                      | 18.13                      | 1.56 |
| SHP-25  | 3.79                       | 7.72                       | 2.03 |
| SHP-50  | 3.84                       | 7.60                       | 1.98 |
| SHP-75  | 3.57                       | 7.02                       | 1.96 |
| SHP-100 | 3.30                       | 7.12                       | 2.15 |

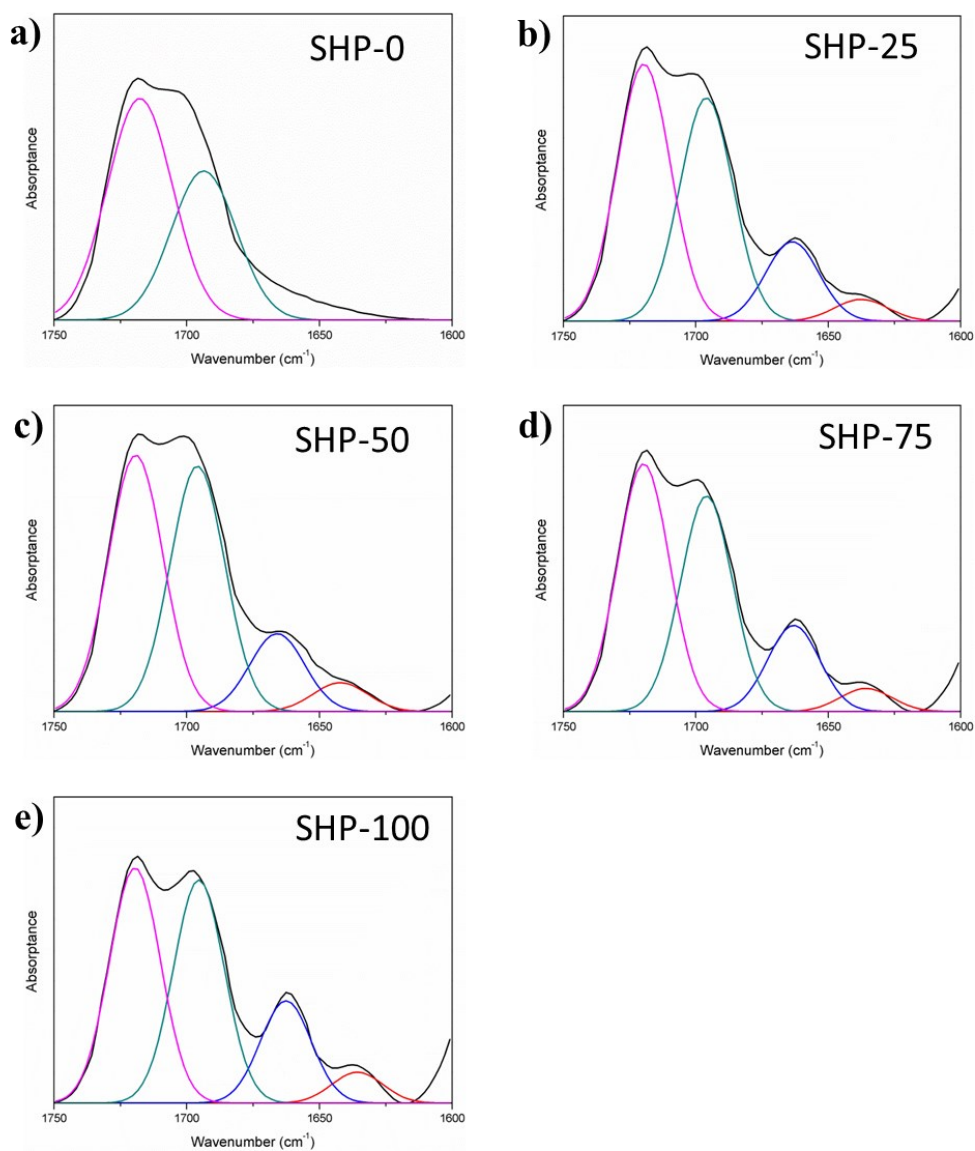

Figure S2. Peak fitting curves of C=O stretching vibration in the region of 1750-1600 cm<sup>-1</sup>

**Table S2. The ratio of C=O in different chemical environments**

| Sample  | C=O(free ) | C=O(urea,free) & C=O(H-bonded,urthane) | C=O(urea,disordered) | C=O(urea,ordered) |
|---------|------------|----------------------------------------|----------------------|-------------------|
| SHP-0   | 40.29%     | 59.71%                                 | 0.00%                | 0.00%             |
| SHP-25  | 42.11%     | 40.34%                                 | 12.81%               | 4.74%             |
| SHP-50  | 44.18%     | 38.38%                                 | 13.68%               | 3.76%             |
| SHP-75  | 43.24%     | 37.66%                                 | 15.07%               | 4.03%             |
| SHP-100 | 39.77%     | 37.72%                                 | 17.29%               | 5.22%             |

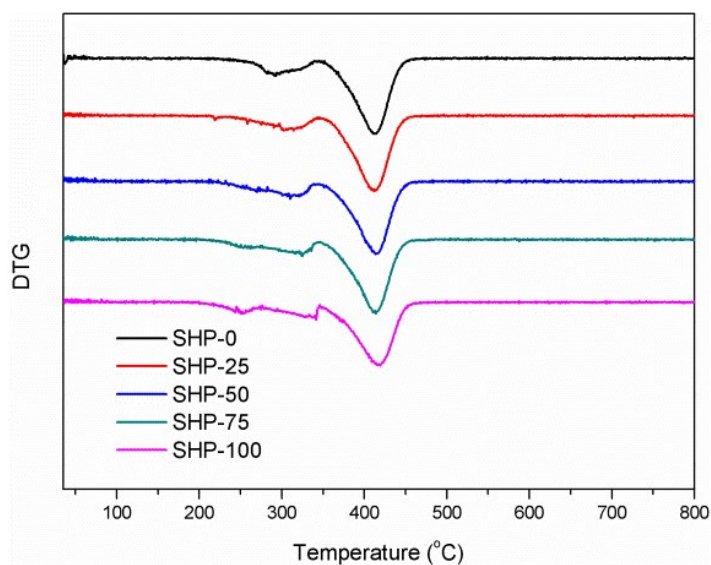

Figure S3. DTG curves of SHP samples.

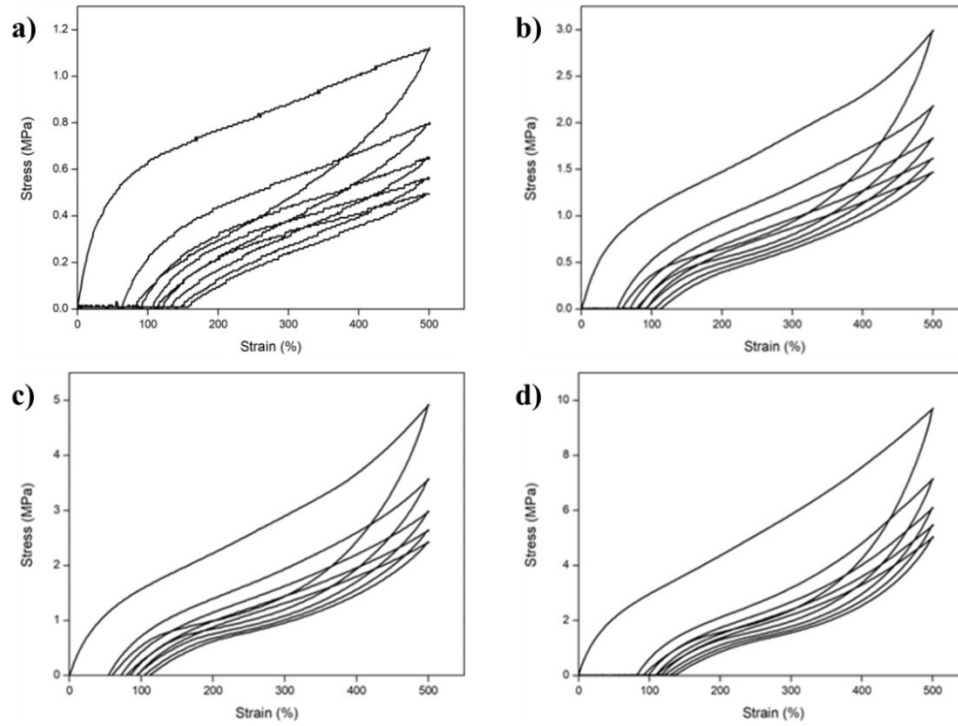

Figure S4. Cycle loading-unloading stress-strain curves of a) SHP-25, b) SHP-50, c) SHP-75, d) SHP-100.

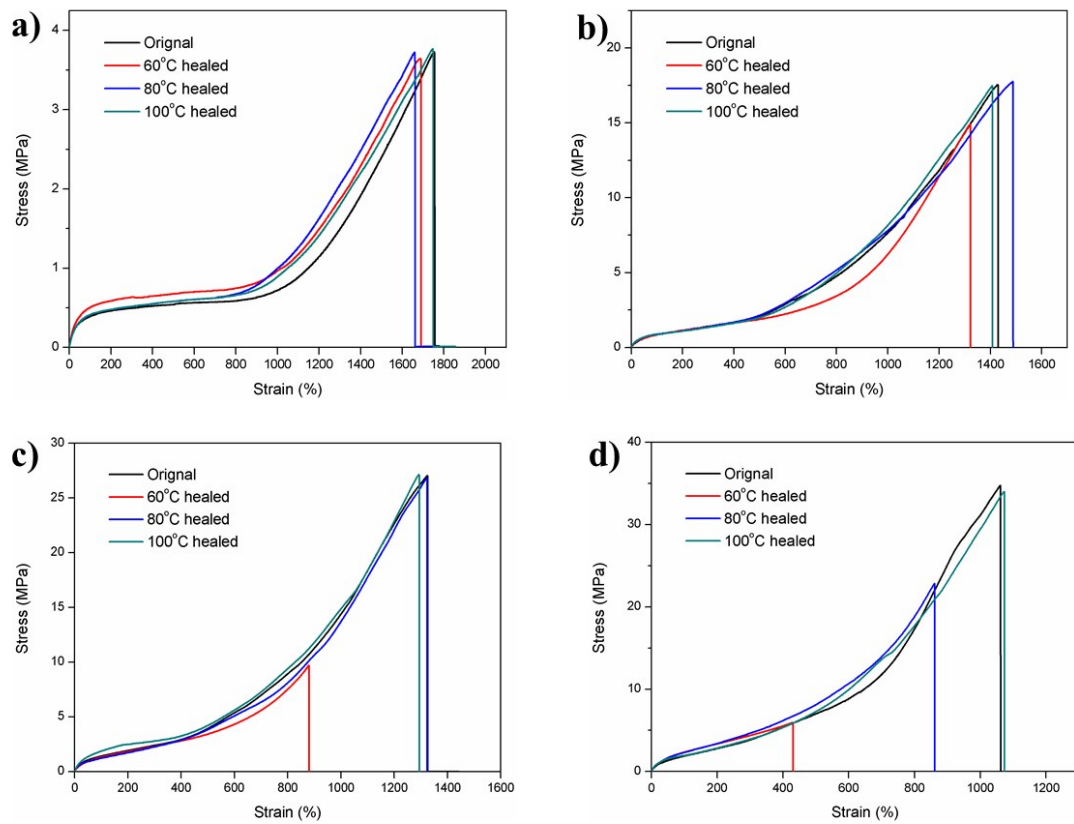

Figure S5. Stress-strain curves of a) SHP-25, b) SHP-50, c) SHP-75, d) SHP-100 samples after heating at different temperatures for 24h.

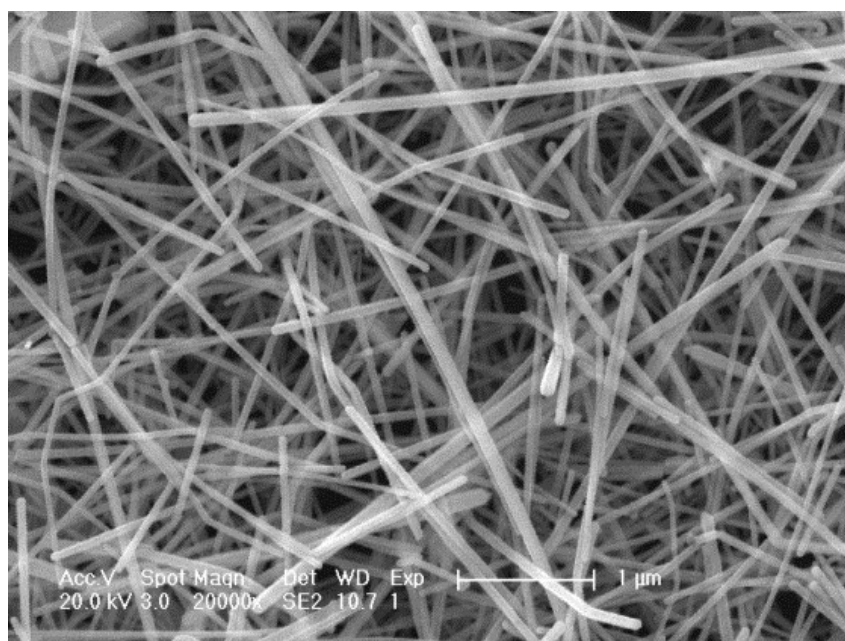

Figure S6. SEM image of the morphology of AgNWs

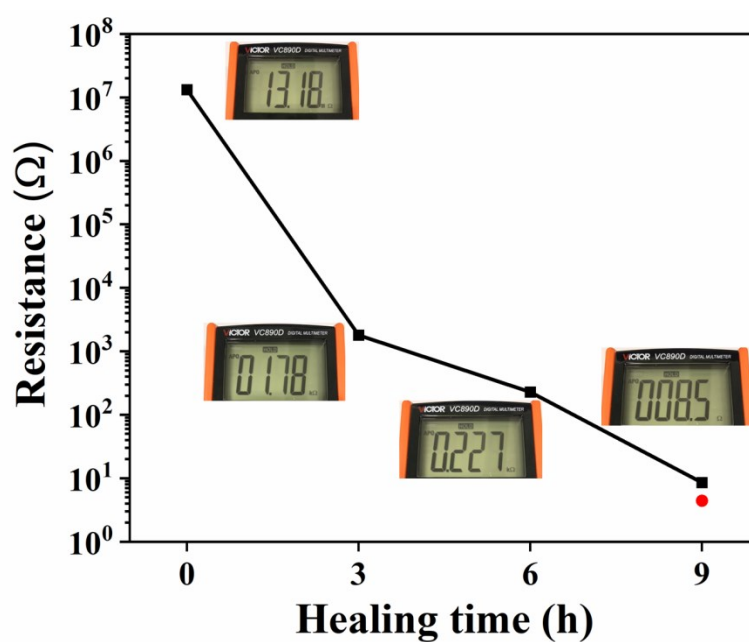

Figure S7. Resistance changes of SHP-75/AgNWs electrode during repairing process, the resistance value corresponding to ● is the original (4.4 Ω).
